# Supplementary material for: Involvement of the miR-137-3p/CAPN-2 Interaction in Ischemia-Reperfusion-Induced Neuronal Apoptosis through Modulation of p35 Cleavage and Subsequent Caspase-8 Overactivation
Source: Hindawi journal article supplement (doi:10.1155/2020/2616871), 2020-12-09
Supplement: f1 [file 2616871.f1.pdf]

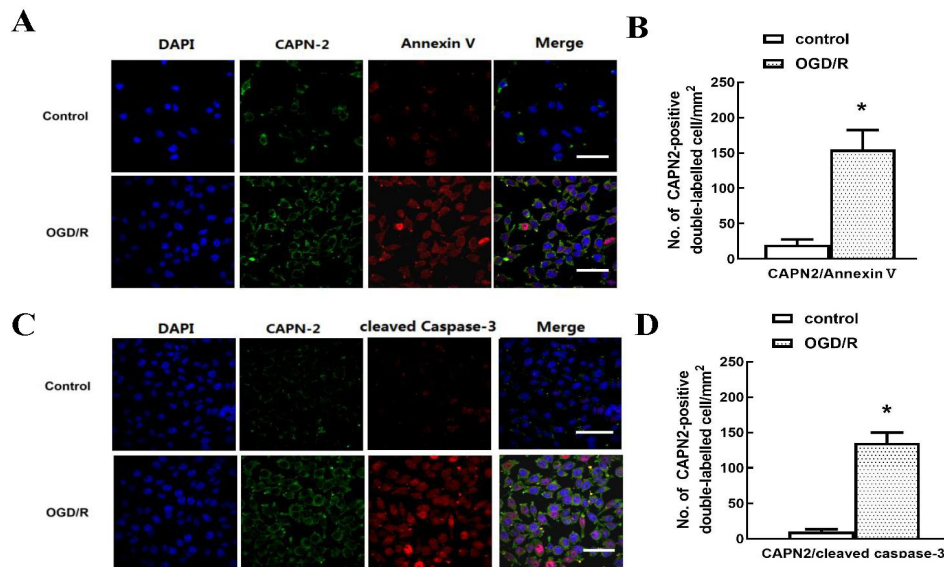

**Supplementary Figure. OGD/R-induced CAPN-2 upregulation and apoptosis in VSC4.1**

**neurons.** A, Representative double immunofluorescence staining showed that DAPI (blue), CAPN-2 (green) and Annexin V (red) were colocalized in the same neurons. Scale bar = 50  $\mu$ m. B, Quantification of the number of CAPN-2-positive neurons with Annexin V. C, Representative double immunofluorescence staining showed that DAPI (blue), CAPN-2 (green) and cleaved caspase-3 (red) were colocalized in the same neurons. Scale bar = 50  $\mu$ m. D, Quantification of the number of CAPN-2-positive neurons with cleaved caspase-3. The data are expressed as the mean $\pm$ SD. \* $P$  < 0.05 versus the control group
